# Supplementary material for: CONS-COCOMAPS: a novel tool to measure and visualize the conservation of inter-residue contacts in multiple docking solutions
Source: PubMed Central journal article supplement (PMC3434444; doi:10.1186/1471-2105-13-s4-s19), 2012-03-28

T24

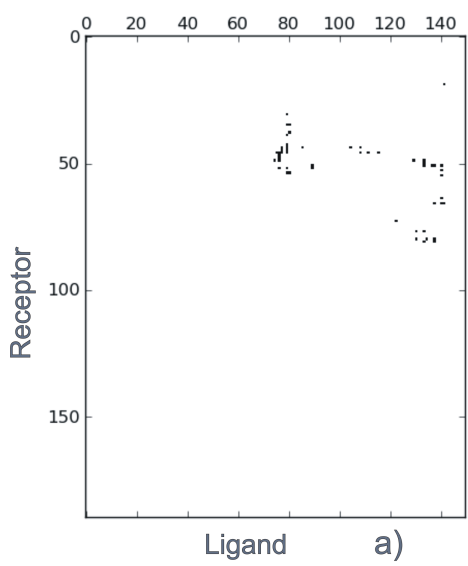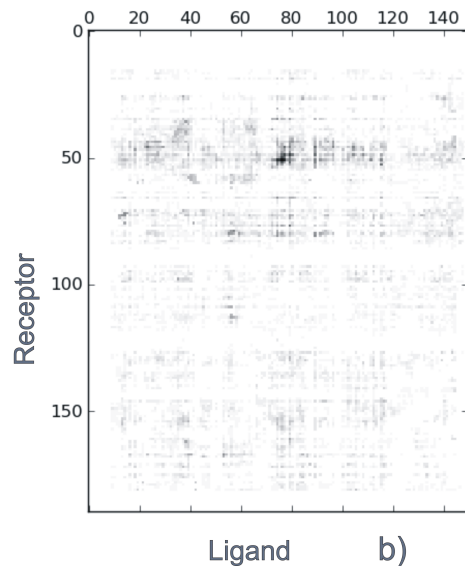

T28

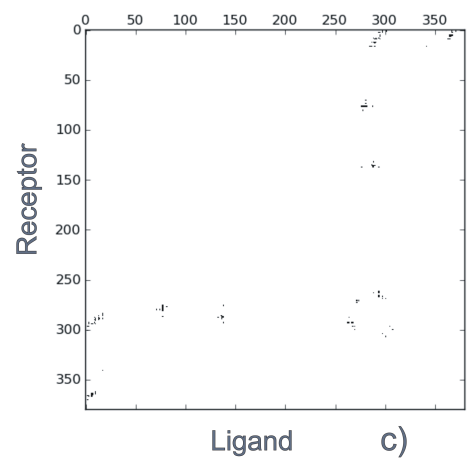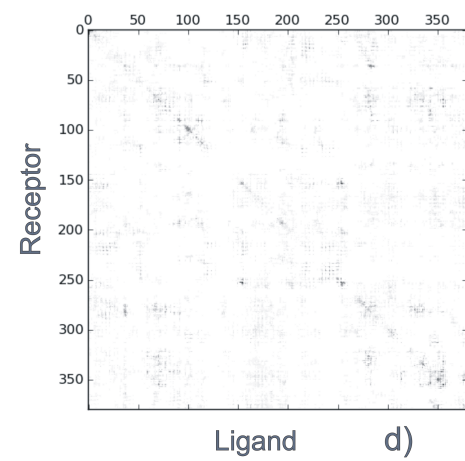

T36

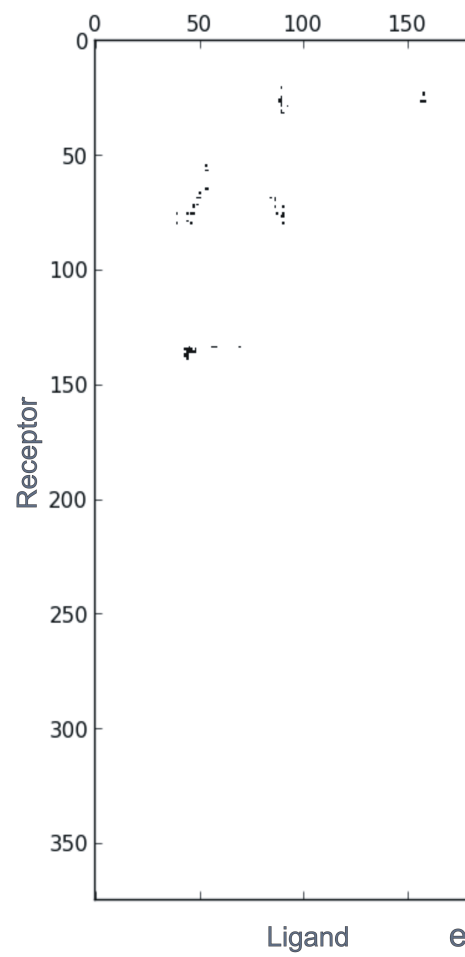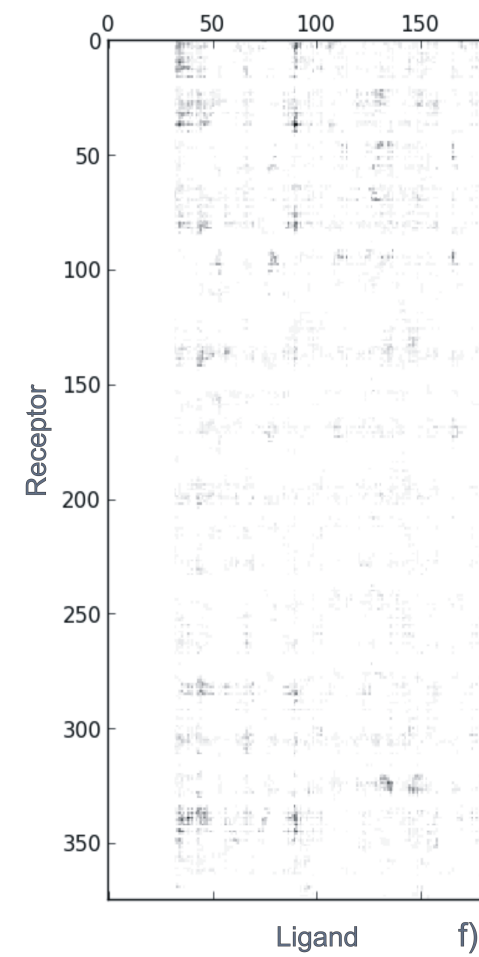

Supplement: 1471-2105-13-S4-S19-S3.pdf [file 1471-2105-13-S4-S19-S3.pdf]
