# Supplementary material for: CONS-COCOMAPS: a novel tool to measure and visualize the conservation of inter-residue contacts in multiple docking solutions
Source: PubMed Central journal article supplement (PMC3434444; doi:10.1186/1471-2105-13-s4-s19), 2012-03-28

T25

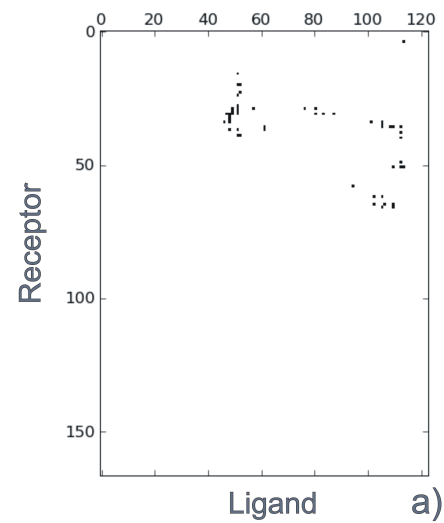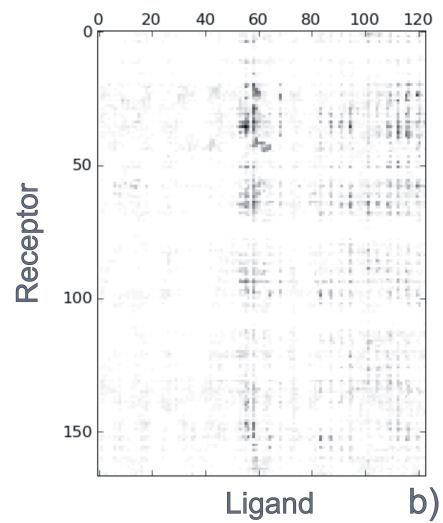

T26

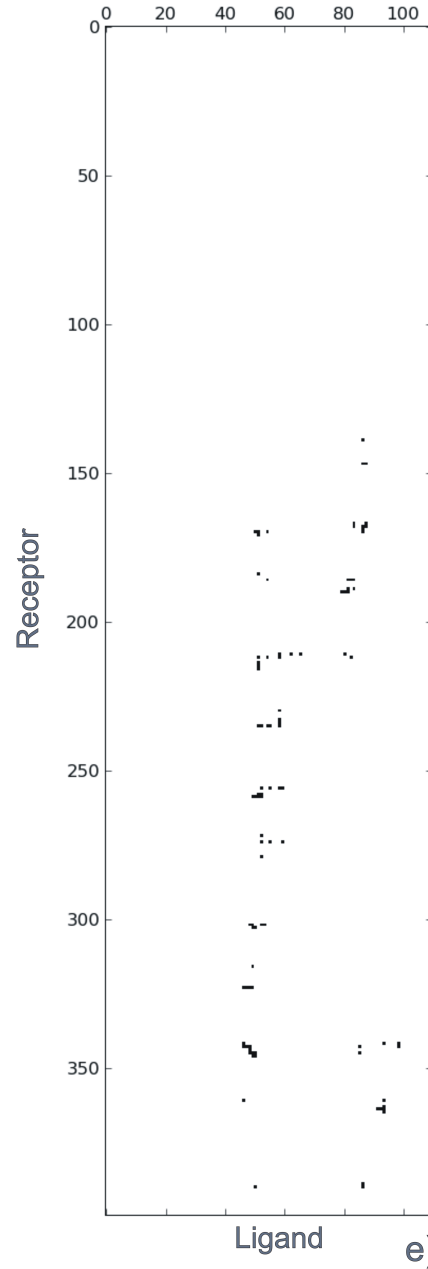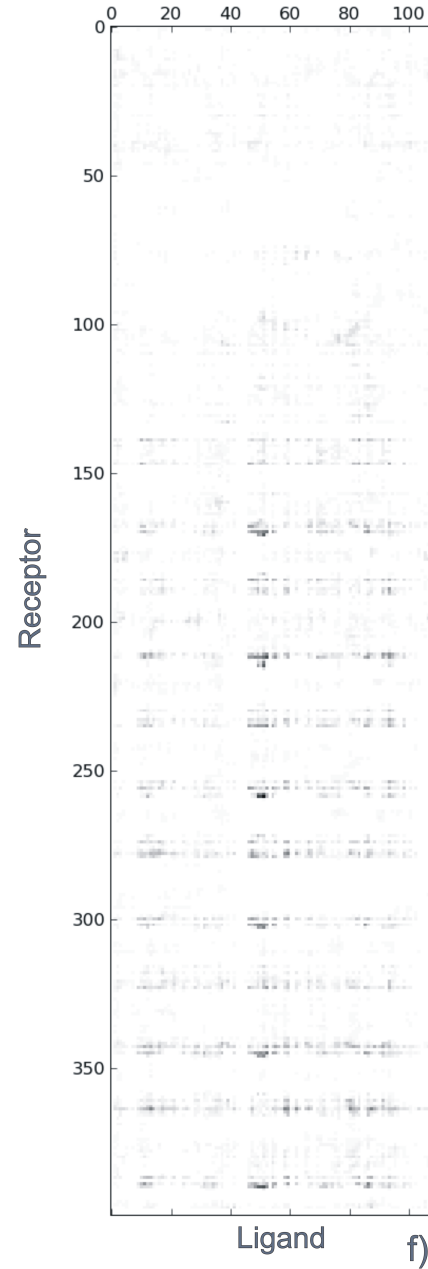

T32

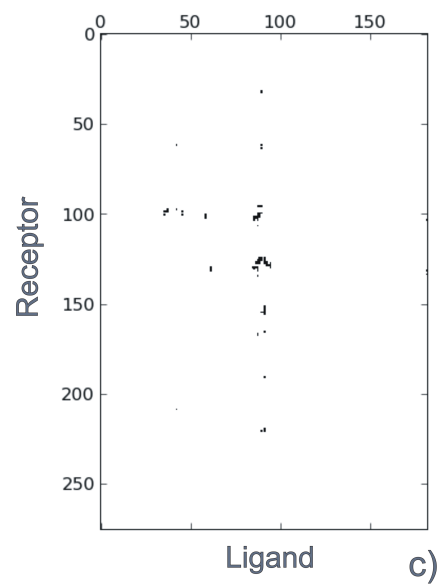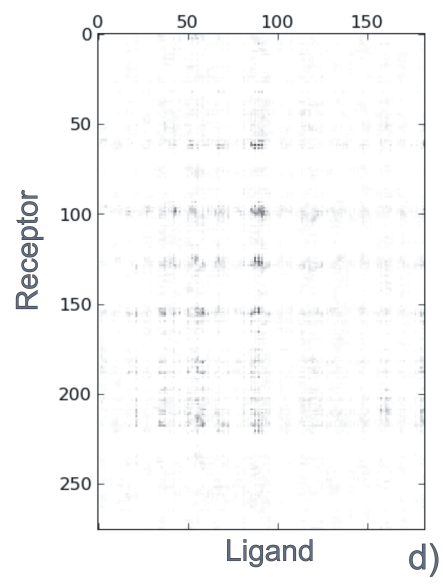

Supplement: 1471-2105-13-S4-S19-S4.pdf [file 1471-2105-13-S4-S19-S4.pdf]
